# Supplementary material for: Role of the carbon defects in the catalytic oxygen reduction by graphite nanoparticles: a spectromagnetic, electrochemical and computational integrated approach
Source: Royal Society of Chemistry journal article supplement (doi:10.1039/c8cp07023g), 2019-01-01
Supplement: c8cp07023g1.pdf [file c8cp07023g1.pdf]

## Supporting Information

# Role of the carbon defects in the catalytic oxygen reduction by graphite nanoparticles: a spectromagnetic, electrochemical and modellistic integrated approach.

*Claudio Greco<sup>1</sup>, Ugo Cosentino<sup>1\*</sup>, Demetrio Pitea<sup>1</sup>, Giorgio Moro<sup>2</sup>, Saveria Santangelo<sup>3</sup>, Salvatore Patanè<sup>4</sup>,  
Massimiliano D'Arienzo<sup>5</sup>, Michele Fiore<sup>5</sup>, Franca Morazzoni<sup>5</sup>, Riccardo Ruffo<sup>5\*</sup>*

<sup>1</sup> Department of Earth and Environmental Sciences, University of Milano-Bicocca, Piazza della Scienza 1,  
I-20126 Milano, Italy

<sup>2</sup> Department of Biotechnology and Biosciences, University of Milano-Bicocca, Piazza della Scienza 2, I-  
20126 Milano, Italy

<sup>3</sup> Università “Mediterranea”, Dip. di Ing. Civile dell’Energia, dell’Ambiente e dei Materiali (DICEAM),  
Salita Melissari I– 89124, Reggio Calabria, Italy

<sup>4</sup> Dipartimento di Scienze Matematiche e Informatiche, Scienze Fisiche e Scienze della Terra (MIFT),  
Università di Messina, Messina, Italy

<sup>5</sup> INSTM, Department of Materials Science, University of Milano-Bicocca, Via R. Cozzi 55, I-20125 Milano,  
Italy

\*corresponding authors

[ugo.cosentino@unimib.it](mailto:ugo.cosentino@unimib.it)

[riccardo.ruffo@unimib.it](mailto:riccardo.ruffo@unimib.it)

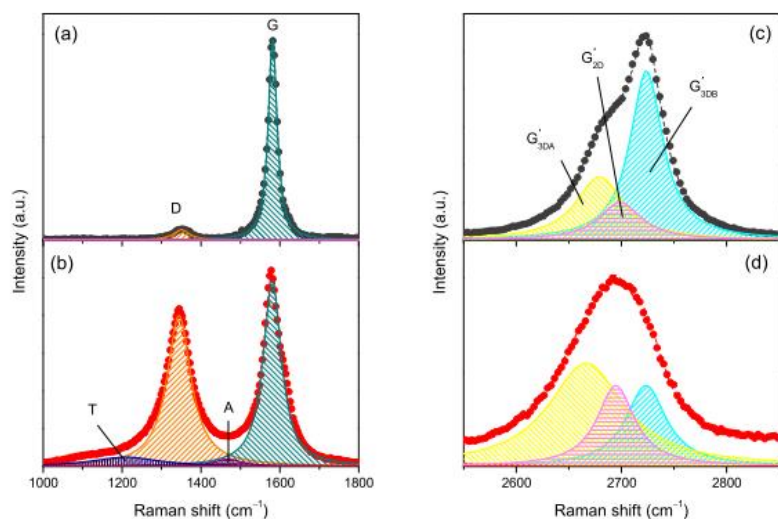

**Figure S1.** Results of spectra fitting. (a–b) First- and (c–d) second-order regions of the spectra of (a,c) commercial and (b,d) ball-milled graphites.

**Table S1.** Centre wavenumber positions ( $\omega$ ) and widths ( $\gamma$ , namely FWHM) of the main bands. The D/G and 3DB/(3DB+2D) integrated intensity ratios ( $I_D/I_G$  and  $I_{3DB}/(I_{3DB}+I_{2D})$ ) are also reported.

| Sample | $\omega_T$           | $\gamma_T$           | $\omega_D$           | $\gamma_D$           | $\omega_A$           | $\gamma_A$           | $\omega_G$           | $\gamma_G$           | $I_D/I_G$ | $I_{3DB}/(I_{3DB}+I_{2D})$ |
|--------|----------------------|----------------------|----------------------|----------------------|----------------------|----------------------|----------------------|----------------------|-----------|----------------------------|
| Code   | ( $\text{cm}^{-1}$ ) |           |                            |
| PG     |                      |                      | 1352                 | 46                   |                      |                      | 1582                 | 22                   | 0.09      | 0.78                       |
| BM     | 1204                 | 212                  | 1344                 | 75                   | 1470                 | 95                   | 1581                 | 55                   | 1.08      | 0.37                       |

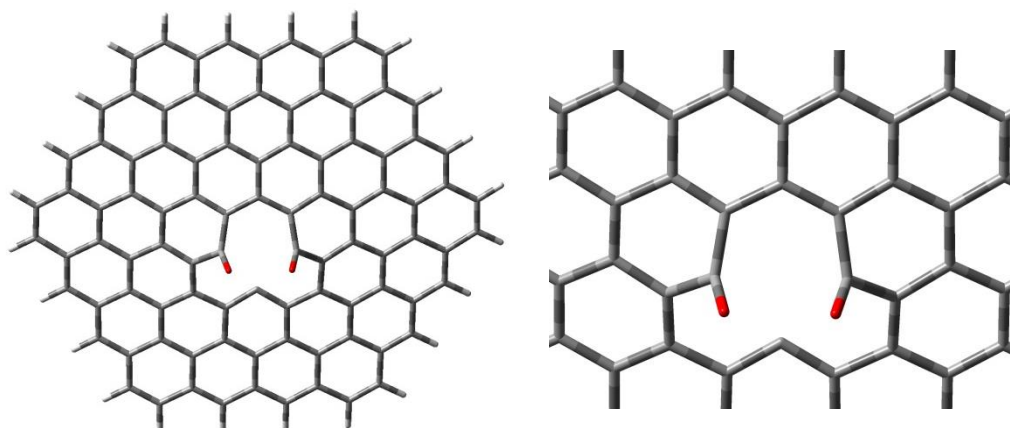

**Figure S2.** Reaction product of  $\text{C}_{95}\text{H}_{24}$  with molecular oxygen

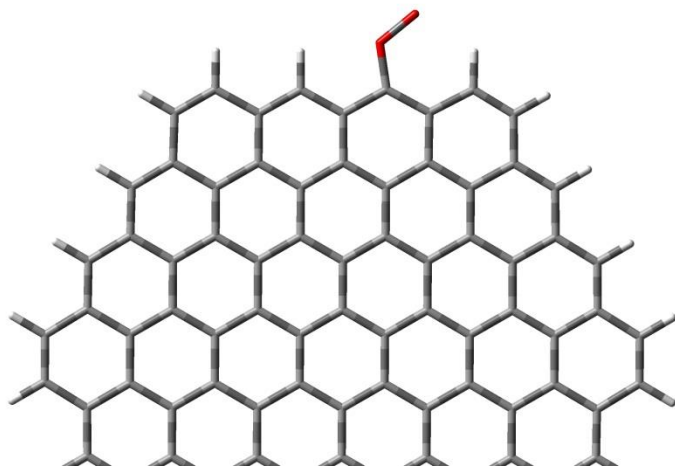

**Figure S3.** Reaction product of  $C_9H_{23}$  with molecular oxygen

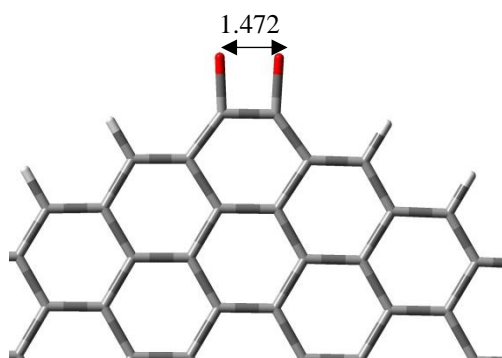

**Figure S4.** Reaction product of  $C_9H_{22}$  with molecular oxygen

**Table S2.** Spin densities at the zig-zag and arm-chair positions of the considered PAH<sup>(-)</sup>. In the case of  $C_{150}H_{30}^{(-)}$ , values at the C<sup>(a)</sup> and the C<sup>(b)</sup> zig-zag positions are reported (see text).

|           | $C_{24}H_{12}^{(-)}$ | $C_{54}H_{18}^{(-)}$ | $C_{96}H_{24}^{(-)}$ | $C_{150}H_{30}^{(-)}$                                 |
|-----------|----------------------|----------------------|----------------------|-------------------------------------------------------|
| Zig-zag   | -                    | 0.17                 | 0.16                 | C <sup>(a)</sup> 0.20<br>C <sup>(b)</sup> 0.10 - 0.15 |
| Arm-chair | 0.20                 | 0.04                 | 0.02                 | 0.01-0.06                                             |
